# Supplementary material for: Antibody secreting cells are critically dependent on integrin α4β7/MAdCAM-1 for intestinal recruitment and control of the microbiota during chronic colitis
Source: PubMed Central journal article supplement (PMC8732264; doi:10.1038/s41385-021-00445-z), 2021-08-25
Supplement: 41385_2021_445_MOESM1_ESM.pdf [file 41385_2021_445_MOESM1_ESM.pdf]

1 **Supplemental Material**

2  
3 **Antibody secreting cells are critically dependent on integrin  $\alpha 4\beta 7$ /MAdCAM-1 for**  
4 **intestinal recruitment and control of the microbiota during chronic colitis**

5  
6 Christopher J. Tyler<sup>1,2</sup>, Mauricio Guzman<sup>1,2</sup>, Luke R. Lundborg<sup>1,2</sup>, Shaila Yeasmin<sup>1,2</sup>, Nadia  
7 Zgajnar<sup>1,2</sup>, Paul Jedlicka<sup>3</sup>, Giorgos Bamias<sup>4</sup> and Jesús Rivera-Nieves<sup>1,2</sup>

8  
9 <sup>1</sup>San Diego VA Medical Center, San Diego, CA.

10  
11 <sup>2</sup>Division of Gastroenterology, University of California San Diego, La Jolla, CA.

12  
13 <sup>3</sup>Department of Pathology, University of Colorado Denver

14  
15 <sup>4</sup>GI Unit, 3rd Academic Department of Internal Medicine, National and Kapodistrian University of  
16 Athens, Sotiria Hospital, Athens, Greece.

17  
18  
19  
20  
21  
22  
23  
24  
25  
26  
27  
28  
29  
30  
31  
32  
33  
34  
35

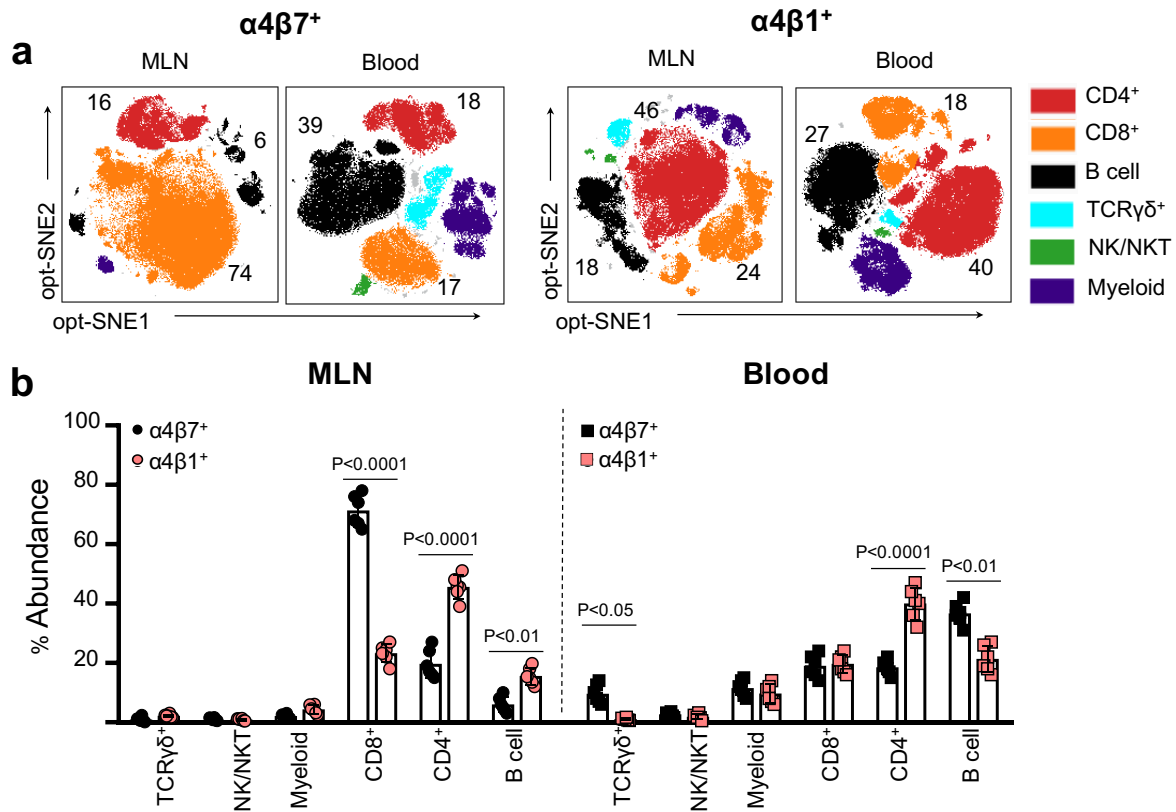

36

37 **Supplemental Figure 1. B cells express predominantly  $\alpha4\beta7$  integrins except at MLN. (a)**

38 Cellular distribution of integrins  $\alpha4\beta1$  and  $\alpha4\beta7$  among the major leukocyte lineages within the  
 39 MLN and peripheral blood. Cells were pre-gated on live, CD45<sup>+</sup> cells, followed by opt-SNE  
 40 analysis. Cell populations including CD4<sup>+</sup> (CD4<sup>+</sup> T cells), CD8<sup>+</sup> (CD8<sup>+</sup> T cells), CD19<sup>+</sup>/IgA<sup>+</sup>/IgG<sup>+</sup>  
 41 (B cells), TCR $\gamma\delta^+$  ( $\gamma\delta$  T cells), CD56<sup>+</sup> (NK/NKT), or MHCII<sup>+</sup>/CD11c<sup>+</sup>/CD11b<sup>+</sup> (myeloid) cells are  
 42 highlighted. **(b)** Percentages of  $\alpha4\beta1$ - and  $\alpha4\beta7$ -expressing cells within the indicated cell lineages  
 43 isolated from MLN and blood. Each data point represents a single mouse. All data are presented  
 44 as mean  $\pm$  S.D, from n>6 mice in each dataset. Statistical significance determined using ANOVA,  
 45 followed by Tukey's multiple comparison test.

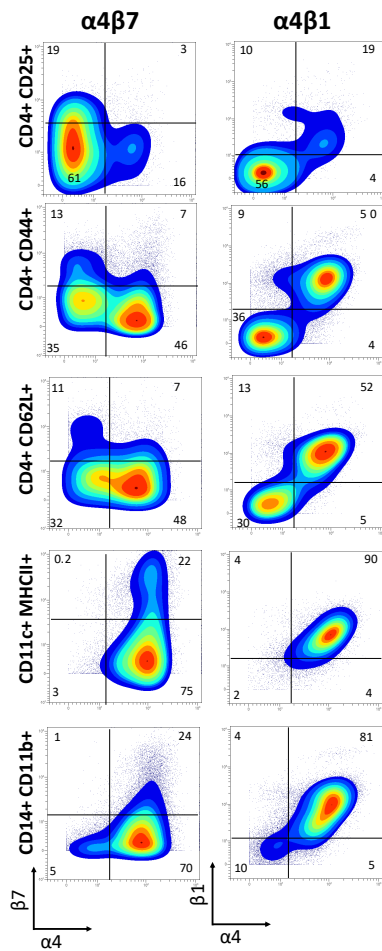

46 **Supplemental Figure 2. CD4 subsets and myeloid lineage subsets predominantly express**  
 47 **integrin  $\alpha 4\beta 1$  in the colonic LP.** Representative pseudo-color plots of  $\alpha 4$ ,  $\beta 7$  and  $\beta 1$  expression  
 48 of the indicated cell subsets in the colonic LP of  $IL-10^{-/-}$  mice. Cells were pre-gated on live,  $CD45^+$   
 49 cells, followed by two-dimensional analyses of mass cytometry data.

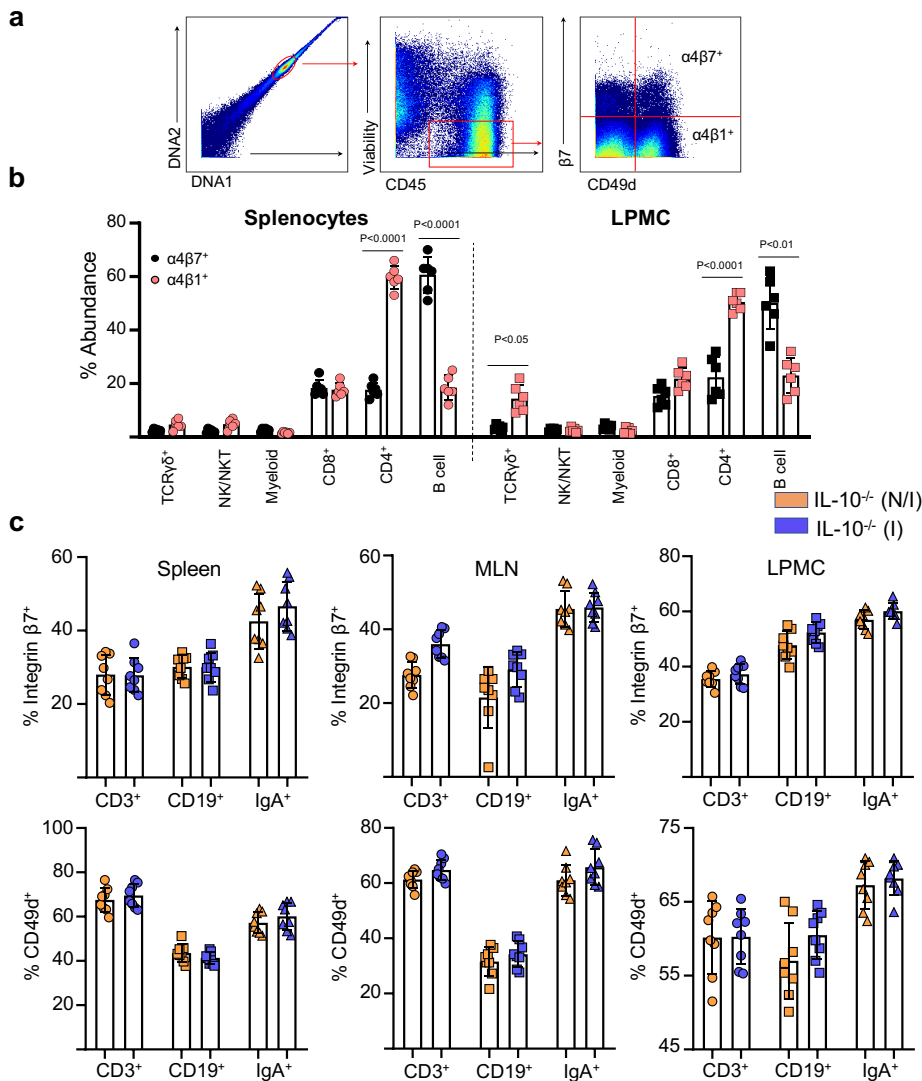

69 **Supplementary Figure 3. Gating strategy and percentage of cell subsets expressing  $\alpha 4$**   
 70 **integrins in IL10 $^{-/-}$  mice and comparison of integrin expression in mice with and without**  
 71 **colitis. (a) Gating strategy for the opt-SNE analysis displayed in Figure 1 and Supplemental**  
 72 **Figures 1,2,3. (b) Summary data displaying lineages represented within murine  $\alpha 4\beta 7$  and**  
 73  **$\alpha 4\beta 1$  cellular events, derived from either splenocytes and colonic LPMC. (c)  $\alpha 4$  and  $\beta 7$  integrin**  
 74 **expression in IL-10 $^{-/-}$  mice with (inflamed (I)) and without colitis (NI). Each data point represents**  
 75 **a single mouse. Error bars display standard deviation of mean. Statistical significance**  
 76 **determined using ANOVA, followed by Tukey's multiple comparison test.**

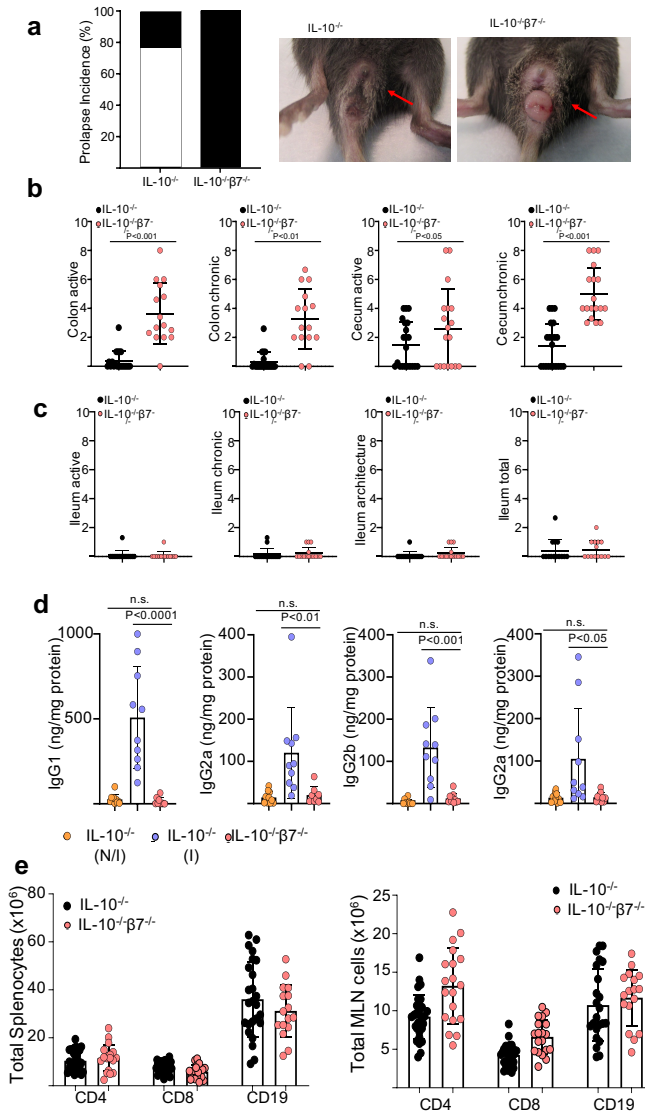

77 **Supplementary Figure 4. Colonic and ileal inflammatory subscores, fecal IgG and cell**  
 78 **counts of IL-10<sup>-/-</sup> and IL-10<sup>-/-</sup>β7<sup>-/-</sup> mice.** (a) Incidence of rectal prolapse among indicated mice  
 79 at 12-weeks-of-age and representative images. (b, c) Active and chronic inflammatory indices  
 80 of colon and cecum and ileum of indicated mice at 8- to 12-weeks-of-age. (d) Fecal  
 81 IgG1, IgG2a, IgG2b, and IgG3 levels of the indicated mouse strains. Immunoglobulin levels  
 82 were normalized to total fecal protein concentration. (e) Absolute cell counts of the indicated  
 83 cell lineages within spleen and MLN of the indicated mouse strains. Each data point  
 84 represents an individual mouse. Error bars display mean and standard deviation of datasets.  
 85 Statistical significance determined using Student's t-test or ANOVA.

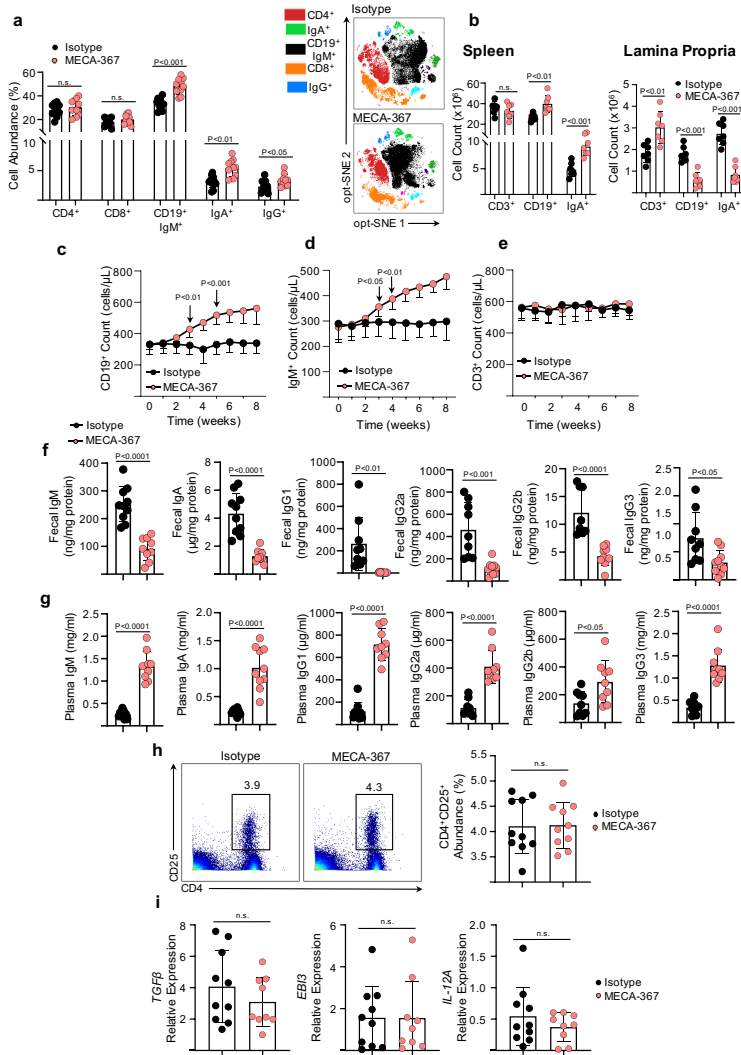

86 **Supplementary Figure 5. Additional MAdCAM-1 blockade experimental data.** (a)  
 87 Percentage of indicated cell types from spleen of treated IL-10<sup>-/-</sup> mice, pre-gated on nucleated,  
 88 live, CD45<sup>+</sup> events. Samples (n=10) were concatenated to generate the opt-SNE plot. (b)  
 89 Absolute cell counts of the indicated cell populations derived from spleen or colonic LP of  
 90 mice after indicated treatments. (c-e) Peripheral blood cell counts of (c) CD19<sup>+</sup>, (d) IgM<sup>+</sup>, and  
 91 (e) CD3<sup>+</sup> cell populations of mice undergoing the indicated treatments. (f) Fecal and (g) plasma  
 92 levels of IgM, IgA, IgG1, IgG2a, IgG2b, and IgG3, derived from IL-10<sup>-/-</sup> mice treated with either  
 93 isotype or MECA-367 for 8 weeks. (h) Representative biaxial mass cytometry plots and  
 94 percentages of CD4<sup>+</sup>CD25<sup>+</sup> T cells within the colonic lamina propria of IL-10<sup>-/-</sup> mice treated with  
 95 either isotype or MECA-367 for 8 weeks. (i) mRNA expression of regulatory cytokines in colon  
 96 of IL-10<sup>-/-</sup> mice receiving indicated treatments for 8 weeks, as determined by RT-qPCR.  
 97 Error bars display mean and standard deviation of datasets. Each data point represents an  
 98 individual mouse. Statistical significance determined using student's t-test.

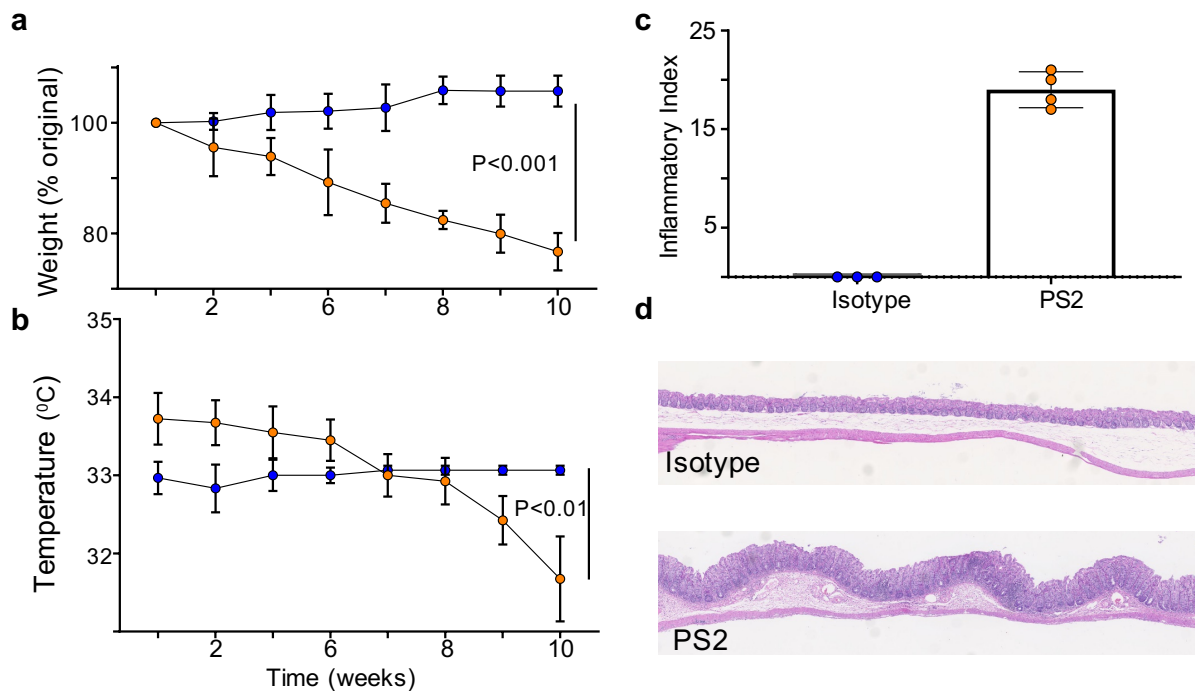

99

100 **Supplemental Figure 6. Integrin  $\alpha 4$  blockade hastened colitis in  $IL10^{-/-}$  mice.** (a) Serial  
 101 weights (b) rectal temperatures, (c) colonic inflammatory indices of  $IL10^{-/-}$  mice treated for 10  
 102 weeks with isotype(●)or MAb PS-2 (anti- $\alpha 4$ (○)). (d) Representative images. All data are presented  
 103 as mean  $\pm$  S.D. from values obtained from 3-4 mice per cohort. Statistical significance was  
 104 determined by student's t-test.  
 105

| mAb             | Conjugate        | Company      | Volume/Test | Clone       | Product Number |
|-----------------|------------------|--------------|-------------|-------------|----------------|
| CD45            | 89Y              | Fluidigm     | 1ul         | 30-F11      | 3089005B       |
| Barcode 1       | 102Pd            | Fluidigm     | -           | -           | -              |
| Barcode 2       | 104Pd            | Fluidigm     | -           | -           | -              |
| Barcode 3       | 105Pd            | Fluidigm     | -           | -           | -              |
| Barcode 4       | 106Pd            | Fluidigm     | -           | -           | -              |
| Barcode 5       | 108Pd            | Fluidigm     | -           | -           | -              |
| Barcode 6       | 110Pd            | Fluidigm     | -           | -           | -              |
| CD19            | CD112 (Qdot 655) | Thermofisher | 0.5ul       | 6D5         | Q10379         |
| CD20            | 113Cd            | BioLegend    | 1ul         | SA271G2     | 152102         |
| CD14            | 114Cd            | BioLegend    | 1ul         | Sa14-2      | 123321         |
| CD44            | 141Pr            | BioLegend    | 0.5ul       | IM7         | 103051         |
| CXCR5           | 142Nd            | Fluidigm     | 1ul         | L138D7      | 3142015B       |
| CD69            | 143Nd            | Fluidigm     | 1ul         | H1.2F3      | 3143004B       |
| CD16/32         | 144Nd            | Fluidigm     | 1ul         | 93          | 3144009B       |
| CD45Rb          | 145Nd            | Fluidigm     | 0.5ul       | C363.16A    | 3145012B       |
| CD5             | 146Nd            | Fluidigm     | 0.5ul       | 537.3       | 3146012B       |
| CD29            | 147Sm            | BioLegend    | 1ul         | HMB1-1      | 102202         |
| CD11b           | 148Nd            | Fluidigm     | 0.25ul      | M1/70       | 3148003B       |
| CD4             | 149Sm            | BioLegend    | 2ul         | RM4-5       | 100561         |
| IgD             | 150Nd            | Fluidigm     | 1ul         | 11-26c.2a   | 3150011B       |
| CD49d           | 151Eu            | N/A          | 1ul         | PS/2        | 3151016B       |
| CD24            | 152Sm            | Fluidigm     | 1ul         | 145-2C11    | 3152004B       |
| NKp46           | 153Eu            | Fluidigm     | 0.5ul       | 29A1.4      | 3153006B       |
| CXCR3           | 154Sm            | BioLegend    | 2ul         | CXCR3-173   | 126502         |
| CD103           | 155Gd            | BioLegend    | 2ul         | 2E7         | 121402         |
| CCR6            | 156Gd            | Fluidigm     | 1ul         | 292L17      | 3156016A       |
| CCR9            | 158Gd            | Origene      | 2ul         | 9B1         | TA320235 Ccr9  |
| CXCR4           | 159Tb            | Fluidigm     | 1ul         | L276F12     | 3159030B       |
| IgA             | 160Gd            | BioLegend    | 1ul         | RMA-1       | 407002         |
| IgM             | 161Dy            | BioLegend    | 0.5ul       | RMM-1       | 406527         |
| Integrin B7     | 162Dy            | Fluidigm     | 1ul         | FIB504      | 3162026B       |
| CCR10           | 163Dy            | R&D          | 1ul         | MAB2815     | MAB2815        |
| CD62L           | 164Dy            | Fluidigm     | 1ul         | MEL-14      | 3164003B       |
| CD80            | 165Ho            | BioLegend    | 1ul         |             |                |
| CD279 (PD-1)    | 166Er            | BioLegend    | 2ul         | RMP1-30     | 109113         |
| TCRgd           | 167Er            | BioLegend    | 0.5ul       | GL3         | 118101         |
| CD8             | 168Er            | Fluidigm     | 1ul         | 536.7       | 3168003B       |
| CD25            | 169Tm            | BioLegend    | 2ul         | 3C7         | 101902         |
| CD161           | 170Er            | Fluidigm     | 1ul         | PK136       | 3170002B       |
| CD38            | 171Yb            | Fluidigm     | 1ul         | 90          | 3171007B       |
| IgG             | 172Yb            | Fluidigm     | 1ul         | Poly        | 3172001G       |
| CD27            | 173Yb            | BioLegend    | 2ul         | LG.3A10     | 124202         |
| I-A/I-E (MHCII) | 174Yb            | Fluidigm     | 0.25ul      | M5/114.15.2 | 3174003B       |
| CD127           | 175Lu            | Fluidigm     | 1ul         | A7R34       | 3175006B       |
| CD11a           | 176Yb            | BioLegend    | 1ul         | I21/7       | 153102         |
| CD11c           | 209Bi            | Fluidigm     | 1ul         | N418        | 3209005B       |
| DNA1            | 191Ir            | Fluidigm     | -           | -           | -              |
| DNA2            | 193Ir            | Fluidigm     | -           | -           | -              |
| Cisplatin       | 195Pt            | Fluidigm     | -           | -           | -              |

106 Supplemental Table 1. Mass cytometry antibody panel
